# Supplementary material for: Oxonium Ion Guided Analysis of Quantitative Proteomics Data Reveals Site-Specific O-Glycosylation of Anterior Gradient Protein 2 (AGR2)
Source: MDPI journal article supplement (doi:10.3390/ijms22105369), 2021-05-20
Supplement: s1 [file s1]

## Supplementary Materials

# Oxonium Ion Guided Analysis of Quantitative Proteomics Data Reveals Site-Specific O-glycosylation of Anterior Gradient Protein 2 (AGR2)

Martina Pirro <sup>1</sup>, Yassene Mohammed <sup>1,2</sup>, Arnoud H. de Ru <sup>1</sup>, George M. C. Janssen <sup>1</sup>, Rayman T. N. Tjokrodirijo <sup>1</sup>, Katarina Madunić <sup>1</sup>, Manfred Wuhler <sup>1</sup>, Peter A. van Veelen <sup>1</sup> and Paul J. Hensbergen <sup>1,\*</sup>

<sup>1</sup> Center for Proteomics and Metabolomics, Leiden University Medical Center, 2333 ZA, Leiden, The Netherlands; M.Pirro@lumc.nl (M.P.); Y.Mohammed@lumc.nl (Y.M.); A.H.de\_Ru@lumc.nl (A.H.d.R.); G.M.C.Janssen@lumc.nl (G.M.C.J.); R.T.N.Tjokrodirijo@lumc.nl (R.T.N.T.); K.Madunic@lumc.nl (K.M.); M.Wuhrer@lumc.nl (M.W.); P.A.van\_Veelen@lumc.nl (P.A.v.V.)

<sup>2</sup> Genome BC Proteomics Centre, University of Victoria, Victoria, BC V8Z 7X8, Canada

\* Correspondence: P.J.Hensbergen@lumc.nl; Tel.: +31-71-5266394; Fax: +31-71-5266907

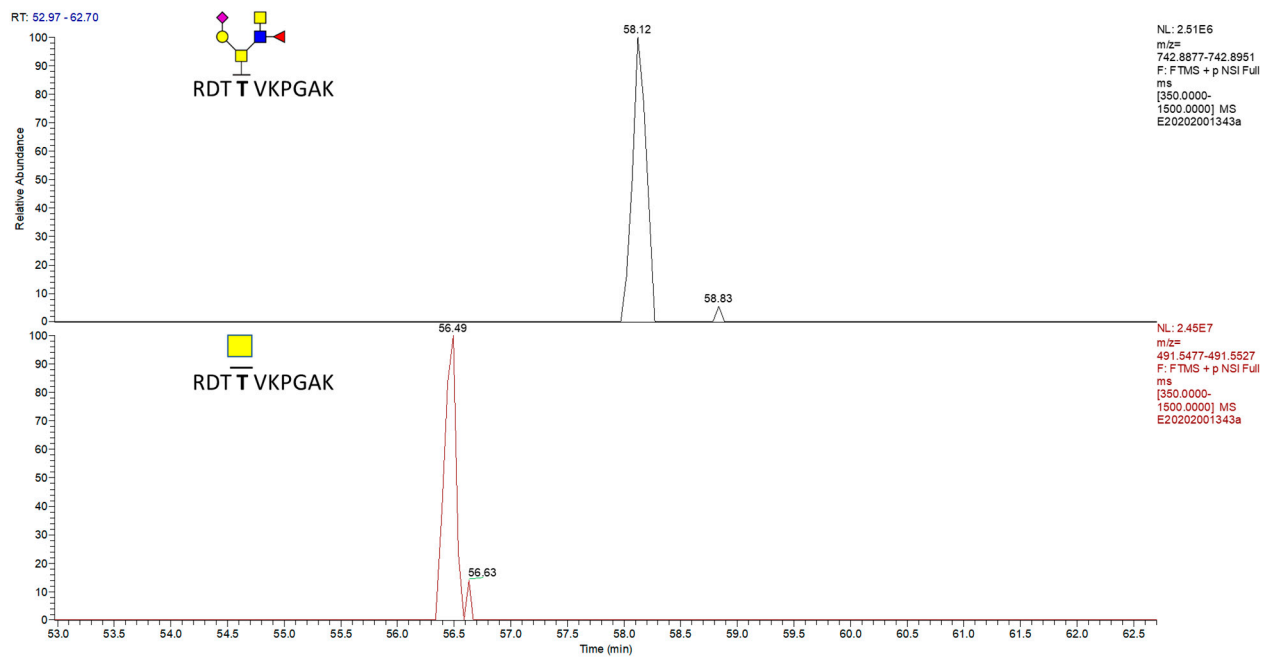

Figure S1. Separation of AGR2 glycopeptides. Chromatographic elution profile of the AGR2 tryptic peptide RDTTVKPGAK carrying the H1N3F1S1 glycan (upper panel,  $m/z$  742.891, RT: 58.12) or the single GalNAc (lower panel,  $m/z$  491.550, RT: 56.49). Blue square: GlcNAc; yellow square: GalNAc; yellow circle: galactose; red triangle: fucose; purple diamond: *N*-acetylneuraminic acid.
